# Supplementary material for: Modulation of Reoviral Cytolysis (I): Combination Therapeutics
Source: MDPI journal article supplement (doi:10.3390/v15071472), 2023-06-29
Supplement: s1 [file s1]

Supplementary Figure S1 a,b

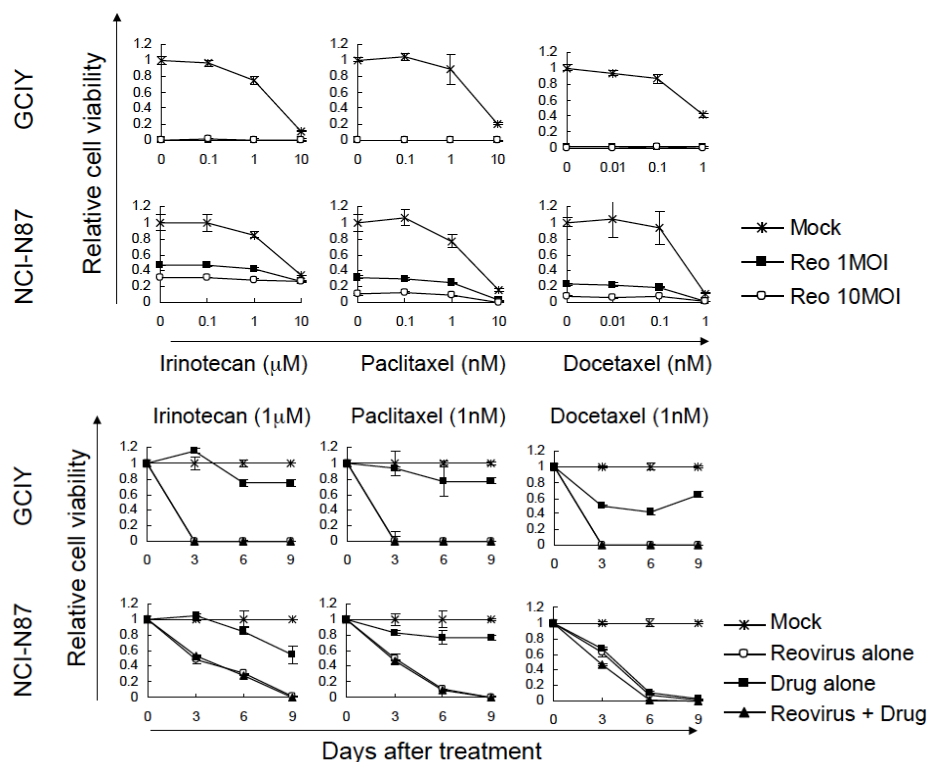

Combination effects of reovirus and chemotherapeutic agents (irinotecan, paclitaxel, docetaxel) on human gastric cancer cell lines (GCIY, NCI-N87). *a*) Cells were infected with 1 or 10 MOI of reovirus and exposed to chemotherapeutic agents at the indicated concentrations. Cell viability was assessed by WST-1 assay at 6 days after treatment. Bars, standard deviation (SD). *b*) Time course of the combined effect of reovirus plus chemotherapeutic agents on gastric cancer cell lines. Cells were treated with 10 MOI of reovirus, chemotherapeutic agent (1  $\mu$ M irinotecan, 1 nM paclitaxel, 1 nM docetaxel), or a combination of both, and cell killing efficacy was evaluated by WST-1 assay over 9 days.

Supplementary Figure S2 a,b

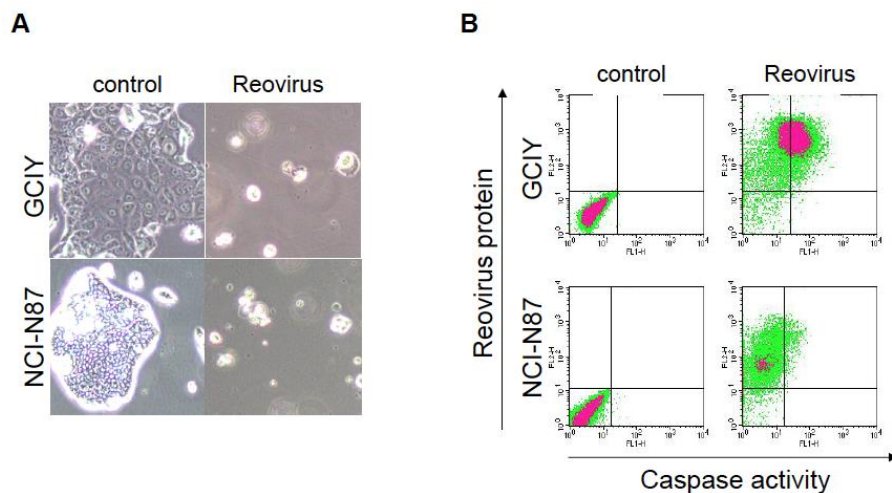

*a*) Cytopathic effects of reovirus in GCIY and NCI-N87. Cells were infected with 10 MOI of reovirus and photographed 5 days after treatment.  $\times 100$  magnification. *b*) Caspase

activation and reovirus protein expression were determined by flow cytometry in gastric cancer cell lines, GCIY and NCI-N87. Cells were treated with 10 MOI of reovirus, and caspase activation and reovirus protein expression were evaluated by flow cytometry at 5 days post treatment.

**Supplementary Figure S3**

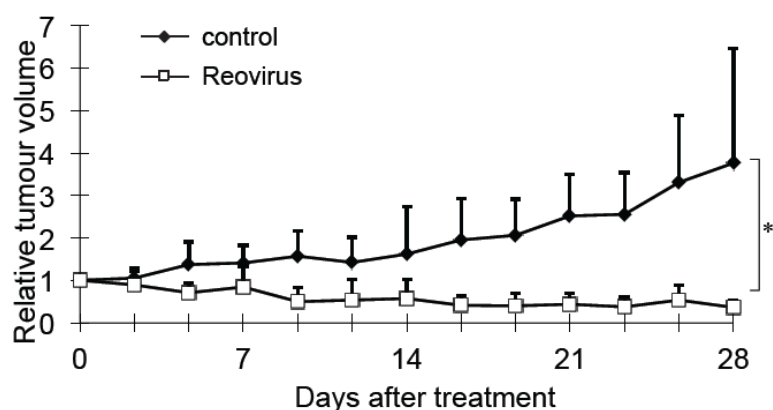

Antitumor effects of intratumourally injected reovirus against established flank GCIY xenograft tumours in nu/nu mice. GCIY cells ( $2 \times 10^6$  cells/each) were subcutaneously injected into the left flanks of mice. Reovirus was administered at  $1 \times 10^8$  pfu/body. Five mice were used for each group. Tumors were measured every 2 or 3 days, and tumour volume was expressed relative to volume at commencement of treatment. Statistical significance was defined as  $p < 0.05$  (\*) (Mann-Whitney *U* test). GCIY gastric cancer cells were very effectively killed by reovirus alone *in vitro* (Fig. 1a) and *in vivo*.
